# Supplementary material for: Effects of home-based telerehabilitation on dynamic alterations in regional intrinsic neural activity and degree centrality in stroke patients
Source: PeerJ. 2023 Sep 1;11:e15903. doi: 10.7717/peerj.15903 (PMC10476610; doi:10.7717/peerj.15903)
Supplement: Supplemental Information 2 [file peerj-11-15903-s002.xlsx]

## Sheet: The raw data
subjects	groups	age（year）	sex	education(year)	smoking	hightension	diabites	lipidemia_obesity	atrial_fibiliation	TIA	MMSE	ST from onset(day)	hemisphere_of_infarction	lesion_location	lesion volume (ml/cc3)	treatment_session_n	duration_of_OT_PT_h	duration_of_ETNS_min	NIHSS	FMA1	FMA2	FMA3
1	CR	67	FEMALE	5	NO	YES	YES	NO	NO	NO	27	12	Left-sided	Basal ganglia	3.45	120	120	2400	2	67	77	75
2	CR	66	MALE	6	YES	NO	NO	NO	NO	NO	28	14	Left-sided	Corona radiate	5.67	105	105	2100	8	75	82	82
3	CR	71	MALE	8	YES	NO	NO	YES	YES	NO	30	18	Right-sided	Basal ganglia	3.32	120	120	2400	5	85	86	92
4	CR	58	MALE	10	YES	NO	NO	YES	NO	NO	29	11	Left-sided	Corona radiate	3.56	108	108	2160	5	60	72	77
5	CR	60	MALE	16	NO	YES	YES	NO	NO	NO	27	14	Right-sided	Corona radiate	5.76	86	86	1720	7	90	92	93
6	CR	56	FEMALE	14	NO	NO	NO	YES	NO	NO	28	13	Left-sided	Internal capsule	7.51	96	96	1920	10	67	76	80
7	CR	77	MALE	12	NO	NO	NO	NO	NO	YES	29	16	Left-sided	Corona radiate	5.66	100	100	2000	8	69	73	76
8	CR	71	FEMALE	13	NO	YES	YES	NO	YES	NO	27	15	Left-sided	Corona radiate	12.64	88	88	1760	17	55	75	88
9	CR	52	MALE	10	YES	NO	NO	NO	NO	NO	27	10	Left-sided	Basal ganglia	11.64	98	98	1960	18	90	91	95
10	CR	76	FEMALE	8	NO	YES	YES	YES	NO	NO	27	9	Left-sided	Basal ganglia	4.57	105	105	2100	5	78	80	90
11	CR	53	FEMALE	14	NO	YES	YES	NO	NO	NO	29	12	Right-sided	Basal ganglia	6.72	116	116	2320	9	85	92	94
12	CR	53	FEMALE	7	NO	NO	NO	NO	YES	NO	29	14	Left-sided	Basal ganglia	4.12	84	84	1680	5	78	84	88
13	CR	61	FEMALE	9	NO	YES	YES	NO	YES	NO	28	14	Right-sided	Basal ganglia	5.62	76	76	1520	7	66	73	75
14	CR	55	FEMALE	10	NO	YES	YES	NO	YES	NO	30	15	Right-sided	Internal capsule	7.21	118	118	2360	9	58	65	72
15	CR	49	FEMALE	5	NO	YES	YES	NO	NO	NO	30	16	Right-sided	Basal ganglia	4.23	78	78	1560	6	76	80	92
16	CR	52	MALE	10	YES	YES	YES	NO	NO	NO	29	17	Right-sided	Basal ganglia	1.02	104	104	2080	2	70	75	91
17	CR	52	MALE	14	YES	NO	NO	YES	NO	NO	29	15	Right-sided	Thalamus	4.66	102	102	2040	5	77	80	88
18	CR	50	FEMALE	12	NO	YES	YES	NO	YES	YES	28	17	Right-sided	Thalamus	1.24	96	96	1920	2	58	65	76
19	CR	69	MALE	10	YES	YES	YES	YES	NO	NO	30	17	Left-sided	Basal ganglia	6.23	78	78	1560	8	69	77	86
20	CR	72	FEMALE	7	NO	YES	YES	NO	YES	NO	28	14	Right-sided	Corona radiate	0.93	109	109	2180	2	75	83	83
21	CR	73	FEMALE	9	NO	NO	NO	NO	YES	NO	27	15	Left-sided	Basal ganglia	2.53	108	108	2160	4	65	72	72
22	CR	46	MALE	8	NO	NO	NO	YES	NO	NO	29	17	Right-sided	Internal capsule	2.52	62	62	1240	3	85	86	86
23	CR	62	FEMALE	7	NO	NO	NO	NO	NO	NO	30	13	Right-sided	Internal capsule	6.21	46	46	920	5	64	64	64
24	CR	51	MALE	12	YES	YES	YES	NO	NO	NO	27	15	Right-sided	Corona radiate	5.43	32	32	640	6	56	56	56
25	CR	51	MALE	15	YES	NO	YES	NO	NO	NO	27	14	Left-sided	Basal ganglia	5.21	54	54	1080	3	77	77	77
26	CR	42	FEMALE	6	NO	YES	NO	NO	YES	NO	28	11	Left-sided	Corona radiate	4.27	12	12	240	4	68	68	68
27	TR	68	MALE	11	YES	NO	NO	YES	NO	NO	27	14	Right-sided	Basal ganglia	3.24	116	116	2320	5	78	93	94
28	TR	61	MALE	5	YES	NO	NO	NO	NO	NO	28	15	Right-sided	Basal ganglia	4.35	120	120	2400	6	75	84	92
29	TR	56	FEMALE	17	NO	NO	NO	NO	NO	NO	29	13	Left-sided	Thalamus	3.12	118	118	2260	3	65	76	82
30	TR	50	FEMALE	16	NO	YES	YES	NO	YES	NO	27	14	Right-sided	Internal capsule	2.08	120	120	2400	3	58	75	85
31	TR	75	MALE	12	NO	YES	YES	NO	YES	NO	28	13	Right-sided	Corona radiate	5.37	98	98	1940	8	67	74	88
32	TR	67	MALE	8	NO	NO	NO	NO	YES	NO	30	15	Left-sided	Basal ganglia	2.14	114	111	2280	5	90	93	96
33	TR	61	FEMALE	5	NO	NO	NO	NO	NO	NO	27	17	Right-sided	Basal ganglia	1.72	105	105	2080	2	82	88	90
34	TR	59	FEMALE	6	NO	YES	YES	YES	NO	NO	28	15	Right-sided	Basal ganglia	3.75	118	118	2290	4	82	86	94
35	TR	70	FEMALE	10	NO	YES	YES	NO	NO	NO	27	17	Right-sided	Basal ganglia	3.67	108	107	2160	3	76	90	92
36	TR	56	MALE	8	YES	YES	YES	NO	NO	YES	29	18	Left-sided	Internal capsule	5.03	96	96	2180	6	75	85	93
37	TR	83	FEMALE	13	NO	YES	YES	NO	NO	NO	30	16	Right-sided	Basal ganglia	6.53	112	112	2240	8	85	92	95
38	TR	60	FEMALE	10	NO	YES	YES	YES	NO	NO	27	14	Left-sided	Thalamus	4.37	115	115	2280	4	55	87	83
39	TR	55	MALE	12	NO	YES	YES	YES	NO	NO	30	12	Right-sided	Corona radiate	5.45	96	96	1940	6	75	90	86
40	TR	65	MALE	13	NO	NO	NO	YES	YES	NO	30	14	Left-sided	Thalamus	3.21	112	112	2240	3	68	85	84
41	TR	64	MALE	15	NO	YES	YES	NO	NO	NO	30	18	Left-sided	Internal capsule	1.89	106	106	2120	2	67	88	85
42	TR	64	MALE	17	YES	YES	YES	YES	NO	NO	29	17	Right-sided	Thalamus	15.63	120	116	2400	19	57	72	85
43	TR	80	MALE	8	NO	YES	YES	NO	NO	NO	28	14	Left-sided	Internal capsule	2.48	96	95	1920	3	86	93	92
44	TR	60	FEMALE	9	NO	NO	NO	NO	NO	NO	27	15	Right-sided	Corona radiate	4.23	114	114	2280	5	88	92	94
45	TR	83	MALE	10	YES	NO	NO	NO	NO	NO	27	11	Right-sided	Basal ganglia	5.34	116	116	2280	6	56	88	83
46	TR	77	FEMALE	6	NO	YES	YES	YES	NO	NO	28	12	Left-sided	Corona radiate	3.23	116	116	2310	3	67	78	81
47	TR	57	MALE	6	NO	YES	YES	YES	NO	NO	29	13	Right-sided	Internal capsule	4.12	94	94	1880	6	79	88	88
48	TR	62	FEMALE	7	NO	NO	NO	NO	NO	NO	28	13	Right-sided	Corona radiate	4.22	106	106	2120	5	65	88	88
49	TR	70	FEMALE	7	NO	NO	YES	NO	NO	NO	29	16	Right-sided	Internal capsule	5.67	34	34	680	8	53	53	53
50	TR	50	MALE	8	YES	NO	NO	NO	NO	NO	30	11	Right-sided	Basal ganglia	5.38	82	80	1640	4	72	72	72
51	TR	63	MALE	13	YES	YES	YES	YES	NO	NO	30	9	Left-sided	Corona radiate	4.12	48	48	960	3	81	81	81
52	TR	53	FEMALE	14	NO	YES	NO	YES	NO	NO	28	13	Left-sided	Basal ganglia	6.27	97	95	1940	5	67	67	67
